# Supplementary material for: Efficient sequential and parallel algorithms for planted motif search
Source: Springer Nature journal article supplement (doi:10.1186/1471-2105-15-34), 2014-01-31

| d  | 4  | 5   | 6    | 7     | 8    | 9    | 10    | 11    | 12    | 13    | 14    | 15     | 16    | 17    | 18     | 19    | 20    | 21    | 22 | 23 | 24 | 25 |  |
|----|----|-----|------|-------|------|------|-------|-------|-------|-------|-------|--------|-------|-------|--------|-------|-------|-------|----|----|----|----|--|
| 13 | 7s |     |      |       |      |      |       |       |       |       |       |        |       |       |        |       |       |       |    |    |    |    |  |
| 14 | 2s |     |      |       |      |      |       |       |       |       |       |        |       |       |        |       |       |       |    |    |    |    |  |
| 15 | 1s | 48s |      |       |      |      |       |       |       |       |       |        |       |       |        |       |       |       |    |    |    |    |  |
| 16 | 1s | 7s  |      |       |      |      |       |       |       |       |       |        |       |       |        |       |       |       |    |    |    |    |  |
| 17 | 1s | 2s  | 5.2m |       |      |      |       |       |       |       |       |        |       |       |        |       |       |       |    |    |    |    |  |
| 18 | 1s | 1s  | 19s  |       |      |      |       |       |       |       |       |        |       |       |        |       |       |       |    |    |    |    |  |
| 19 | 1s | 1s  | 3s   | 26.6m |      |      |       |       |       |       |       |        |       |       |        |       |       |       |    |    |    |    |  |
| 20 | 1s | 1s  | 1s   | 1.4m  |      |      |       |       |       |       |       |        |       |       |        |       |       |       |    |    |    |    |  |
| 21 | 1s | 1s  | 1s   | 10s   | 2.2m |      |       |       |       |       |       |        |       |       |        |       |       |       |    |    |    |    |  |
| 22 | 1s | 1s  | 1s   | 3s    | 4.1m |      |       |       |       |       |       |        |       |       |        |       |       |       |    |    |    |    |  |
| 23 | 1s | 1s  | 1s   | 1s    | 23s  | 7.3m |       |       |       |       |       |        |       |       |        |       |       |       |    |    |    |    |  |
| 24 | 1s | 1s  | 1s   | 1s    | 5s   | 14m  |       |       |       |       |       |        |       |       |        |       |       |       |    |    |    |    |  |
| 25 | 1s | 1s  | 1s   | 1s    | 2s   | 1.2m | 20.5m |       |       |       |       |        |       |       |        |       |       |       |    |    |    |    |  |
| 26 | 1s | 1s  | 1s   | 1s    | 1s   | 12s  | 44.3m | 46.9h |       |       |       |        |       |       |        |       |       |       |    |    |    |    |  |
| 27 | 1s | 1s  | 1s   | 1s    | 1s   | 4s   | 3.6m  | 49.2m |       |       |       |        |       |       |        |       |       |       |    |    |    |    |  |
| 28 | 1s | 1s  | 1s   | 1s    | 1s   | 2s   | 30s   | 2.2m  |       |       |       |        |       |       |        |       |       |       |    |    |    |    |  |
| 29 | 1s | 1s  | 1s   | 1s    | 1s   | 1s   | 8s    | 8.4m  | 2.01h |       |       |        |       |       |        |       |       |       |    |    |    |    |  |
| 30 | 1s | 1s  | 1s   | 1s    | 1s   | 1s   | 3s    | 1.2m  | 5.5m  |       |       |        |       |       |        |       |       |       |    |    |    |    |  |
| 31 | 1s | 1s  | 1s   | 1s    | 1s   | 1s   | 2s    | 17s   | 21.3m | 4.31h |       |        |       |       |        |       |       |       |    |    |    |    |  |
| 32 | 1s | 1s  | 1s   | 1s    | 1s   | 1s   | 1s    | 6s    | 2.9m  | 13.8m |       |        |       |       |        |       |       |       |    |    |    |    |  |
| 33 | 1s | 1s  | 1s   | 1s    | 1s   | 1s   | 1s    | 2s    | 37s   | 1.3m  | 9.45h |        |       |       |        |       |       |       |    |    |    |    |  |
| 34 | 1s | 1s  | 1s   | 1s    | 1s   | 1s   | 1s    | 2s    | 11s   | 8m    | 32m   |        |       |       |        |       |       |       |    |    |    |    |  |
| 35 | 1s | 1s  | 1s   | 1s    | 1s   | 1s   | 1s    | 1s    | 4s    | 1.4m  | 3m    | 20.71h |       |       |        |       |       |       |    |    |    |    |  |
| 36 | 1s | 1s  | 1s   | 1s    | 1s   | 1s   | 1s    | 1s    | 2s    | 23s   | 19m   | 1.25h  |       |       |        |       |       |       |    |    |    |    |  |
| 37 | 1s | 1s  | 1s   | 1s    | 1s   | 1s   | 1s    | 1s    | 1s    | 8s    | 3.2m  | 7.5m   |       |       |        |       |       |       |    |    |    |    |  |
| 38 | 1s | 1s  | 1s   | 1s    | 1s   | 1s   | 1s    | 1s    | 1s    | 3s    | 46s   | 1.1m   | 2.91h |       |        |       |       |       |    |    |    |    |  |
| 39 | 1s | 1s  | 1s   | 1s    | 1s   | 1s   | 1s    | 1s    | 1s    | 1s    | 15s   | 8.2m   | 19.1m |       |        |       |       |       |    |    |    |    |  |
| 40 | 1s | 1s  | 1s   | 1s    | 1s   | 1s   | 1s    | 1s    | 1s    | 1s    | 6s    | 1.7m   | 3m    |       |        |       |       |       |    |    |    |    |  |
| 41 | 1s | 1s  | 1s   | 1s    | 1s   | 1s   | 1s    | 1s    | 1s    | 1s    | 3s    | 29s    | 21.3m | 44.6m |        |       |       |       |    |    |    |    |  |
| 42 | 1s | 1s  | 1s   | 1s    | 1s   | 1s   | 1s    | 1s    | 1s    | 1s    | 2s    | 11s    | 3.8m  | 7.1m  | 13.12h |       |       |       |    |    |    |    |  |
| 43 | 1s | 1s  | 1s   | 1s    | 1s   | 1s   | 1s    | 1s    | 1s    | 1s    | 1s    | 4s     | 59s   | 1.2m  | 1.74h  |       |       |       |    |    |    |    |  |
| 44 | 1s | 1s  | 1s   | 1s    | 1s   | 1s   | 1s    | 1s    | 1s    | 1s    | 1s    | 2s     | 20s   | 9.5m  | 17.6m  |       |       |       |    |    |    |    |  |
| 45 | 1s | 1s  | 1s   | 1s    | 1s   | 1s   | 1s    | 1s    | 1s    | 1s    | 1s    | 2s     | 7s    | 2m    | 3.1m   |       |       |       |    |    |    |    |  |
| 46 | 1s | 1s  | 1s   | 1s    | 1s   | 1s   | 1s    | 1s    | 1s    | 1s    | 1s    | 1s     | 3s    | 36s   | 24.9m  | 43.6m |       |       |    |    |    |    |  |
| 47 | 1s | 1s  | 1s   | 1s    | 1s   | 1s   | 1s    | 1s    | 1s    | 1s    | 1s    | 1s     | 2s    | 14s   | 4.8m   | 8m    |       |       |    |    |    |    |  |
| 48 | 1s | 1s  | 1s   | 1s    | 1s   | 1s   | 1s    | 1s    | 1s    | 1s    | 1s    | 1s     | 1s    | 2s    | 6s     | 1.2m  | 1.4m  | 1.83h |    |    |    |    |  |
| 49 | 1s | 1s  | 1s   | 1s    | 1s   | 1s   | 1s    | 1s    | 1s    | 1s    | 1s    | 1s     | 1s    | 3s    | 25s    | 11.9m | 21.3m |       |    |    |    |    |  |
| 50 | 1s | 1s  | 1s   | 1s    | 1s   | 1s   | 1s    | 1s    | 1s    | 1s    | 1s    | 1s     | 1s    | 2s    | 9s     | 2.5m  | 4m    | 4.61h |    |    |    |    |  |

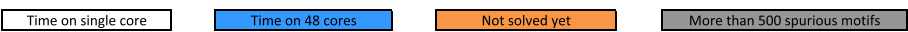

Supplement: 12859_2013_6306_MOESM5_ESM.pdf [file 12859_2013_6306_MOESM5_ESM.pdf]
