# Supplementary material for: Efficient sequential and parallel algorithms for planted motif search
Source: Springer Nature journal article supplement (doi:10.1186/1471-2105-15-34), 2014-01-31

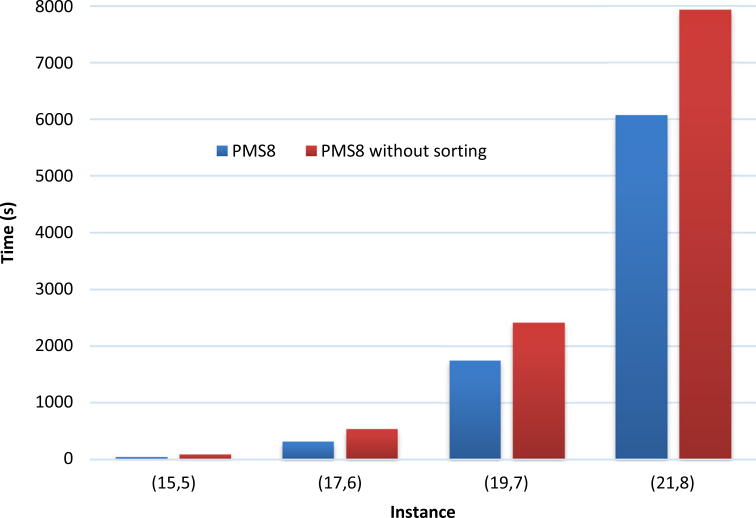

Supplement: 12859_2013_6306_MOESM4_ESM.pdf [file 12859_2013_6306_MOESM4_ESM.pdf]
